# Supplementary material for: Diverse Immunomodulatory Effects of Individual IFNα Subtypes on Virus-Specific CD8+ T Cell Responses
Source: PubMed Central journal article supplement (PMC6771563; doi:10.3389/fimmu.2019.02255), 2019-09-24
Supplement: Data_Sheet_1.pdf [file Data_Sheet_1.pdf]

Figure S1

A

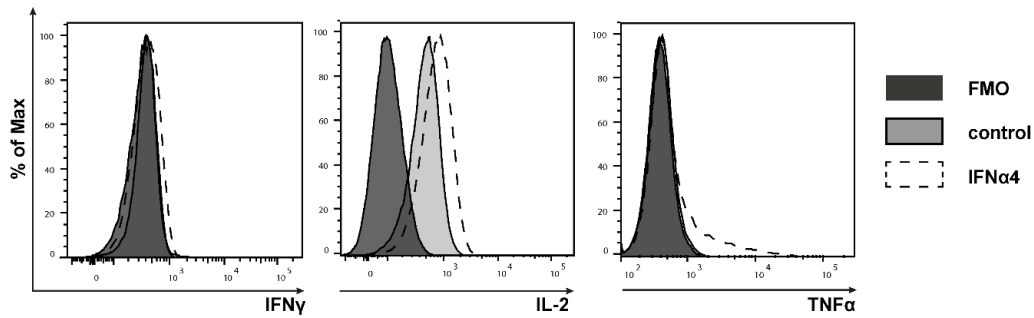

B

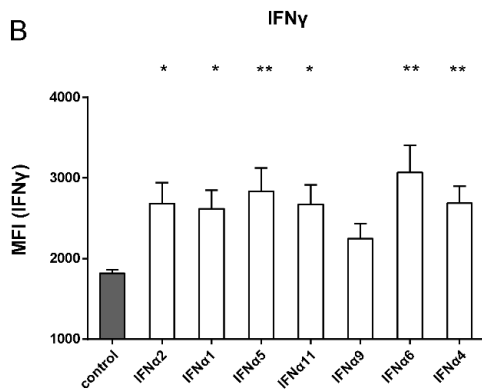

C

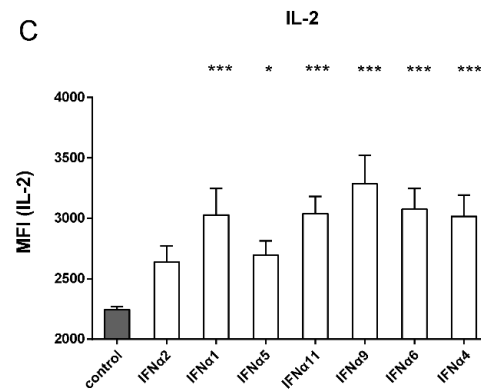

D

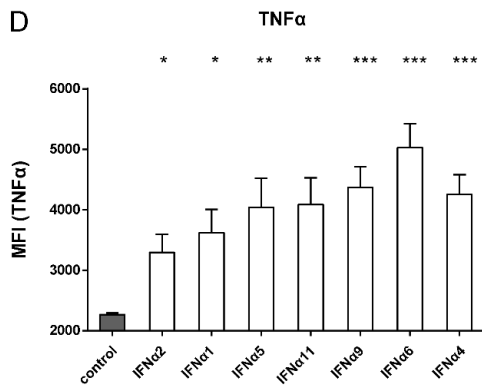

**Figure S1. Analysis of intracellular cytokine expression of IFN $\alpha$  subtype treated CD8<sup>+</sup> T cells.** Positively sorted Cell Trace<sup>TM</sup> Violet-labeled CD8<sup>+</sup> T cells from FV-specific TCRtg mice were co-cultured with FV peptide-loaded BM-DCs in the presence or absence of different murine IFN $\alpha$  subtypes for 72 hours (500 units/well). Multi-parametric flow cytometry was used to determine MFI of intracellular expression of IFN $\gamma$ , IL-2 and TNF $\alpha$  in CD8<sup>+</sup> T cells. (A) Representative histograms of unstimulated, IFN $\alpha$ 4-stimulated CD8<sup>+</sup> T cells and FMOs are shown. Intracellular expression (MFI) of (B) IFN $\gamma$ , (C) IL-2 and (D) TNF $\alpha$  are shown. Mean values (+SEM) are indicated by bars and the IFN $\alpha$  subtypes were sorted in the order of their antiproliferative potency (n=15). Statistically significant differences between the IFN $\alpha$ -treated groups and the untreated group were tested using Kruskal-Wallis one-way or Ordinary One Way ANOVA analysis and Dunn's multiple comparison and are indicated by \* for p < 0.05; \*\* for p < 0.01; \*\*\* for p < 0.001.

Figure S2

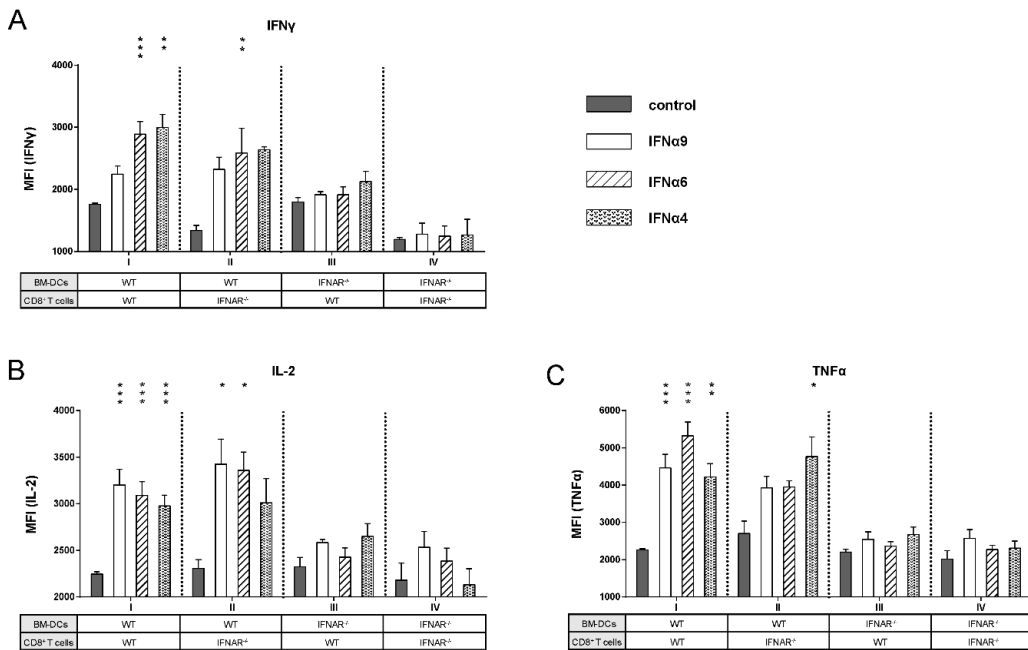

**Figure S2. Influence of IFNAR expression on intracellular cytokine expression of IFN $\alpha$  subtype-stimulated CD8<sup>+</sup> T cells.** Positively enriched Cell Trace<sup>TM</sup> Violet-labeled CD8<sup>+</sup> T cells from FV-specific TCRtg (WT) or IFNAR<sup>-/-</sup> TCRtg (IFNAR<sup>-/-</sup>) mice were co-cultured with FV peptide-loaded WT or IFNAR<sup>-/-</sup> BM-DCs in the presence or absence of IFN $\alpha$ 4, IFN $\alpha$ 6 and IFN $\alpha$ 9 for 72 hours (500 units/well). Multi-parametric flow cytometry was used to determine MFI of intracellular expression of (A) IFN $\gamma$ , (B) IL-2 and (C) TNF $\alpha$  in CD8<sup>+</sup> T cells. Mean values (+SEM) are indicated by bars and the IFN $\alpha$  subtypes were sorted in the order of their antiproliferative potency ( $n \geq 6$ ). Statistically significant differences between the IFN $\alpha$ -treated groups and the untreated group were tested using Kruskal-Wallis one-way or Ordinary One Way ANOVA analysis and Dunn's multiple comparison and are indicated by \* for  $p < 0.05$ ; \*\* for  $p < 0.01$ ; \*\*\* for  $p < 0.001$ .
